# Supplementary material for: Effect of Extreme Temperatures and Driving Conditions on Gaseous Pollutants of a Euro 6d-Temp Gasoline Vehicle
Source: MDPI journal article supplement (doi:10.3390/atmos12081011), 2021-08-06
Supplement: s1 [file s1]

## Article

# Effect of Extreme Temperatures and Driving Conditions on Gaseous Pollutants of a Euro 6d-Temp Gasoline Vehicle

Barouch Giechaskiel <sup>1,\*</sup>, Victor Valverde <sup>1</sup>, Anastasios Kontses <sup>2</sup>, Ricardo Suarez-Bertoa <sup>1</sup>, Tommaso Selleri <sup>1</sup>, Anastasios Melas <sup>1</sup>, Marcos Otura <sup>1</sup>, Christian Ferrarese <sup>1</sup>, Giorgio Martini <sup>1</sup>, Andreas Balazs <sup>3</sup>, Jon Andersson <sup>4</sup>, Zisis Samaras <sup>2</sup> and Panagiota Dilara <sup>5</sup>

- <sup>1</sup> European Commission, Joint Research Centre (JRC), 21027 Ispra, Italy; victor.valverde-morales@ec.europa.eu (V.V.); ricardo.suarez-bertoa@ec.europa.eu (R.S.-B.); tommaso.selleri@ec.europa.eu (T.S.); anastasios.melas@ec.europa.eu (A.M.); marcos.otura@ec.europa.eu (M.O.); christian.ferrarese@ec.europa.eu (C.F.); giorgio.martini@ec.europa.eu (G.M.)
- <sup>2</sup> Laboratory of Applied Thermodynamics, Aristotle University Thessaloniki, 54124 Thessaloniki, Greece; akontses@auth.gr (A.K.); zisis@auth.gr (Z.S.)
- <sup>3</sup> FEV Europe GmbH, 52078 Aachen, Germany; balazs@fev.com
- <sup>4</sup> Ricardo Automotive & Industrial, Shoreham Technical Centre, Shoreham-by-Sea BN43 5FG, UK; jon.andersson@ricardo.com
- <sup>5</sup> European Commission, DG-GROW, 1040 Brussels, Belgium; panagiota.dilara@ec.europa.eu
- \* Correspondence: barouch.giechaskiel@ec.europa.eu; Tel.: +39-0332-78-5312

## SUPPLEMENTARY INFORMATION

**Table S1:** Distance specific emission factors.

| Cycle      | Temp<br>[°C] | FC<br>[l/100 km] | NO <sub>x</sub><br>[mg/km] | CO<br>[mg/km] | THC<br>[mg/km] | CH <sub>4</sub><br>[mg/km] | NH <sub>3</sub><br>[mg/km] | N <sub>2</sub> O<br>[mg/km] |
|------------|--------------|------------------|----------------------------|---------------|----------------|----------------------------|----------------------------|-----------------------------|
| Uphill     | -10          | 23.0             | 72.3                       | 2028          | 241.4          | 16.4                       | 38.5                       | 2.4                         |
| Uphill 85% | -7           | 28.3             | 81.6                       | 2375          | 228.9          | 15.6                       | 59.9                       | 1.9                         |
| TfL        | 50           | 20.2             | 91.9                       | 1098          | 50.5           | 16.0                       | 30.4                       | 5.7                         |
|            | 23           | 14.1             | 32.5                       | 543           | 149.6          | 54.1                       | 31.9                       | 5.1                         |
|            | 5            | 14.9             | 32.4                       | 572           | 141.4          | 20.2                       | 23.4                       | 4.5                         |
|            | -7           | 15.7             | 72.1                       | 1244          | 339.8          | 17.2                       | 27.4                       | 2.5                         |
|            | -10          | 17.0             | 109.5                      | 1483          | 356.7          | 22.9                       | 36.0                       | 3.1                         |
|            | -30          | 20.7             | 55.1                       | 4738          | 853.4          | 53.7                       | 33.6                       | 2.4                         |
| BAB        | 50           | 10.2             | 17.7                       | 931           | 11.1           | 2.3                        | 11.2                       | 0.5                         |
|            | 23           | 9.0              | 5.7                        | 480           | 12.1           | 5.8                        | 8.3                        | 0.2                         |
|            | 5            | 8.4              | 2.3                        | 277           | 7.9            | 0.7                        | 2.3                        | 0.1                         |
|            | -7           | 8.8              | 4.4                        | 323           | 8.8            | 1.0                        | 2.4                        | 0.0                         |
|            | -10          | 8.3              | 3.8                        | 279           | 6.9            | 0.7                        | 4.1                        | 0.1                         |
|            | -30          | 8.6              | 4.0                        | 293           | 9.4            | 0.8                        | 2.8                        | 0.0                         |

Table S1: cont.

| Cycle                   | Temp<br>[°C] | FC<br>[l/100 km] | NO <sub>x</sub><br>[mg/km] | CO<br>[mg/km] | THC<br>[mg/km] | CH <sub>4</sub><br>[mg/km] | NH <sub>3</sub><br>[mg/km] | N <sub>2</sub> O<br>[mg/km] |
|-------------------------|--------------|------------------|----------------------------|---------------|----------------|----------------------------|----------------------------|-----------------------------|
| RDE short urban         | 50           | 15.6             | 24.8                       | 418           | 26.6           | 2.4                        | 7.6                        | 1.0                         |
|                         | 23           | 11.4             | 21.9                       | 394           | 55.6           | 5.1                        | 15.0                       | 2.1                         |
|                         | 5            | 11.3             | 16.7                       | 407           | 83.1           | 5.7                        | 10.1                       | 2.8                         |
|                         | -10          | 12.5             | 28.0                       | 1238          | 171.6          | 11.5                       | 14.4                       | 1.4                         |
|                         | -30          | 15.1             | 35.6                       | 2827          | 501.6          | 38.2                       | 20.5                       | 1.3                         |
| RDE short rural         | 50           | 7.9              | 1.3                        | 265           | 1.7            | 0.2                        | 2.4                        | 0.2                         |
|                         | 23           | 6.5              | 5.1                        | 175           | 0.0            | 0.7                        | 4.1                        | 0.1                         |
|                         | 5            | 6.5              | 4.5                        | 168           | 0.9            | 0.2                        | 1.4                        | 0.0                         |
|                         | -10          | 6.3              | 5.0                        | 137           | 1.0            | 0.0                        | 1.6                        | 0.0                         |
|                         | -30          | 6.9              | 4.6                        | 117           | 1.9            | 0.3                        | 0.7                        | 0.0                         |
| RDE short motorway      | 50           | 9.2              | 3.3                        | 768           | 14.1           | 2.8                        | 6.7                        | 0.5                         |
|                         | 23           | 7.7              | 4.9                        | 432           | 9.9            | 0.0                        | 9.0                        | 0.3                         |
|                         | 5            | 7.7              | 2.9                        | 344           | 9.1            | 1.5                        | 3.7                        | 0.1                         |
|                         | -10          | 7.5              | 6.2                        | 446           | 13.3           | 0.0                        | 9.3                        | 0.2                         |
|                         | -30          | 7.8              | 4.7                        | 320           | 11.2           | 1.6                        | 6.0                        | 0.1                         |
| RDE short               | 50           | 10.3             | 7.8                        | 497           | 12.6           | 1.8                        | 5.3                        | 0.5                         |
|                         | 23           | 8.2              | 9.2                        | 331           | 16.9           | 2.3                        | 8.7                        | 0.7                         |
|                         | 5            | 8.1              | 6.9                        | 295           | 24.2           | 2.0                        | 4.4                        | 0.7                         |
|                         | -10          | 8.3              | 11.1                       | 526           | 47.5           | 3.8                        | 7.7                        | 0.4                         |
|                         | -30          | 9.2              | 12.2                       | 1013          | 126.5          | 10.0                       | 7.5                        | 0.4                         |
| RDE boundary            | -10          | 13.5             | 19.0                       | 772           | 79.5           | 22.5                       | 9.2                        | 0.3                         |
| RDE boundary motorway   | -10          | 9.4              | 13.2                       | 962           | 35.2           | 10.9                       | 9.4                        | 0.2                         |
| RDE boundary rural      | -10          | 8.1              | 6.3                        | 845           | 26.7           | 11.4                       | 10.4                       | 0.2                         |
| RDE boundary urban      | -10          | 17.7             | 29.0                       | 716           | 120.2          | 31.0                       | 8.2                        | 0.3                         |
| RDE boundary urban 10km | -10          | 19.2             | 75.1                       | 2008          | 404.8          | 56.7                       | 27.7                       | 1.3                         |
| RDE road 1              | 20           | 8.1              | 7.5                        | 172           |                |                            |                            |                             |
| RDE road 1 motorway     | 20           | 7.6              | 5.5                        | 342           |                |                            |                            |                             |
| RDE road 1 rural        | 20           | 6.7              | 3.2                        | 138           |                |                            |                            |                             |
| RDE road 1 urban        | 20           | 9.6              | 12.8                       | 65            |                |                            |                            |                             |
| RDE road 2              | 17           | 7.9              | 6.5                        | 114           |                |                            |                            |                             |
| RDE road 2 motorway     | 17           | 7.3              | 3.1                        | 191           |                |                            |                            |                             |
| RDE road 2 rural        | 17           | 6.2              | 2.7                        | 99            |                |                            |                            |                             |
| RDE road 2 urban        | 17           | 10.1             | 13.1                       | 50            |                |                            |                            |                             |

**Table S2:** Fuel specific emission factors.

| Cycle                   | Temp<br>[°C] | Ratio<br>km/kg | NO <sub>x</sub><br>[mg/kg] | CO<br>[mg/kg] | THC<br>[mg/kg] | CH <sub>4</sub><br>[mg/kg] | NH <sub>3</sub><br>[mg/kg] | N <sub>2</sub> O<br>[mg/kg] |
|-------------------------|--------------|----------------|----------------------------|---------------|----------------|----------------------------|----------------------------|-----------------------------|
| Uphill                  | -10          | 5.8            | 418.8                      | 11739         | 1397.5         | 94.8                       | 223.1                      | 14.0                        |
| Uphill 85%              | -7           | 4.7            | 383.8                      | 11173         | 1076.7         | 73.5                       | 281.7                      | 8.8                         |
| TfL                     | 50           | 6.6            | 605.5                      | 7233          | 332.7          | 105.3                      | 200.1                      | 37.6                        |
|                         | 23           | 9.4            | 306.8                      | 5126          | 1411.7         | 510.5                      | 300.9                      | 48.2                        |
|                         | 5            | 9.0            | 290.5                      | 5125          | 1266.7         | 180.8                      | 210.1                      | 40.6                        |
|                         | -7           | 8.5            | 611.2                      | 10549         | 2880.6         | 146.1                      | 232.2                      | 21.1                        |
|                         | -10          | 7.8            | 856.7                      | 11600         | 2789.7         | 178.8                      | 281.6                      | 24.1                        |
|                         | -30          | 6.4            | 355.1                      | 30524         | 5497.5         | 345.7                      | 216.7                      | 15.6                        |
| BAB                     | 50           | 13.0           | 229.7                      | 12117         | 144.5          | 29.4                       | 145.9                      | 6.5                         |
|                         | 23           | 14.8           | 84.3                       | 7083          | 178.7          | 86.1                       | 123.1                      | 2.3                         |
|                         | 5            | 15.9           | 36.6                       | 4403          | 125.7          | 11.8                       | 36.3                       | 1.3                         |
|                         | -7           | 15.2           | 66.9                       | 4907          | 133.7          | 14.9                       | 35.7                       | 0.5                         |
|                         | -10          | 16.0           | 61.0                       | 4474          | 110.7          | 10.6                       | 66.0                       | 0.8                         |
|                         | -30          | 15.4           | 61.7                       | 4516          | 145.1          | 11.7                       | 43.2                       | 0.3                         |
| RDE short urban         | 50           | 8.5            | 211.8                      | 3568          | 227.2          | 20.5                       | 64.6                       | 8.3                         |
|                         | 23           | 11.7           | 255.8                      | 4614          | 651.4          | 59.7                       | 175.7                      | 24.8                        |
|                         | 5            | 11.8           | 197.2                      | 4806          | 981.4          | 67.3                       | 118.8                      | 33.1                        |
|                         | -10          | 10.7           | 299.7                      | 13248         | 1836.7         | 123.1                      | 154.1                      | 14.9                        |
|                         | -30          | 8.9            | 315.4                      | 25043         | 4443.5         | 338.4                      | 181.2                      | 11.1                        |
| RDE short rural         | 50           | 16.8           | 21.9                       | 4469          | 28.6           | 3.4                        | 40.0                       | 3.5                         |
|                         | 23           | 20.6           | 106.2                      | 3604          | 0.0            | 14.9                       | 85.2                       | 1.7                         |
|                         | 5            | 20.6           | 92.7                       | 3471          | 18.5           | 4.1                        | 29.2                       | 0.6                         |
|                         | -10          | 21.2           | 105.8                      | 2899          | 21.2           | 0.0                        | 33.5                       | 0.3                         |
|                         | -30          | 19.4           | 89.4                       | 2266          | 36.9           | 5.8                        | 13.9                       | 0.2                         |
| RDE short motorway      | 50           | 14.4           | 47.6                       | 11079         | 203.3          | 40.4                       | 96.8                       | 6.9                         |
|                         | 23           | 17.3           | 84.7                       | 7472          | 171.2          | 0.0                        | 155.5                      | 5.6                         |
|                         | 5            | 17.4           | 50.5                       | 5992          | 158.5          | 26.1                       | 63.7                       | 2.3                         |
|                         | -10          | 17.7           | 109.7                      | 7899          | 235.4          | 0.0                        | 164.0                      | 2.7                         |
|                         | -30          | 17.1           | 80.5                       | 5477          | 191.9          | 27.4                       | 103.1                      | 2.4                         |
| RDE short               | 50           | 12.9           | 100.8                      | 6418          | 162.8          | 23.3                       | 68.7                       | 6.5                         |
|                         | 23           | 16.2           | 148.5                      | 5361          | 273.4          | 37.0                       | 140.1                      | 10.9                        |
|                         | 5            | 16.5           | 113.5                      | 4846          | 398.1          | 32.9                       | 72.1                       | 12.2                        |
|                         | -10          | 16.1           | 178.7                      | 8465          | 764.7          | 61.2                       | 123.5                      | 6.5                         |
|                         | -30          | 14.5           | 176.6                      | 14659         | 1830.7         | 144.7                      | 108.8                      | 5.2                         |
| RDE boundary            | -10          | 9.9            | 187.4                      | 7625          | 784.9          | 221.8                      | 90.5                       | 2.5                         |
| RDE boundary motorway   | -10          | 14.1           | 186.4                      | 13602         | 497.8          | 153.8                      | 133.4                      | 2.7                         |
| RDE boundary rural      | -10          | 16.5           | 104.2                      | 13975         | 441.8          | 188.9                      | 172.8                      | 2.9                         |
| RDE boundary urban      | -10          | 7.5            | 218.6                      | 5397          | 906.5          | 234.0                      | 61.5                       | 2.4                         |
| RDE boundary urban 10km | -10          | 7.0            | 521.9                      | 13959         | 2813.8         | 394.3                      | 192.6                      | 8.8                         |
| RDE road 1              | 20           | 16.6           | 123.5                      | 2850          |                |                            |                            |                             |
| RDE road 1 motorway     | 20           | 17.5           | 95.8                       | 5974          |                |                            |                            |                             |
| RDE road 1 rural        | 20           | 20.0           | 64.3                       | 2753          |                |                            |                            |                             |
| RDE road 1 urban        | 20           | 13.9           | 177.8                      | 903           |                |                            |                            |                             |
| RDE road 2              | 17           | 16.8           | 109.1                      | 1909          |                |                            |                            |                             |
| RDE road 2 motorway     | 17           | 18.3           | 56.4                       | 3498          |                |                            |                            |                             |
| RDE road 2 rural        | 17           | 21.6           | 58.0                       | 2130          |                |                            |                            |                             |
| RDE road 2 urban        | 17           | 13.2           | 173.6                      | 663           |                |                            |                            |                             |
